# Supplementary figures and images for: The circular RNA circFARSA sponges microRNA-330-5p in tumor cells with bladder cancer phenotype
Source: PubMed Central journal article supplement (PMC8991568; doi:10.1186/s12885-022-09467-7), 2022-04-08

Raw WB images

3C

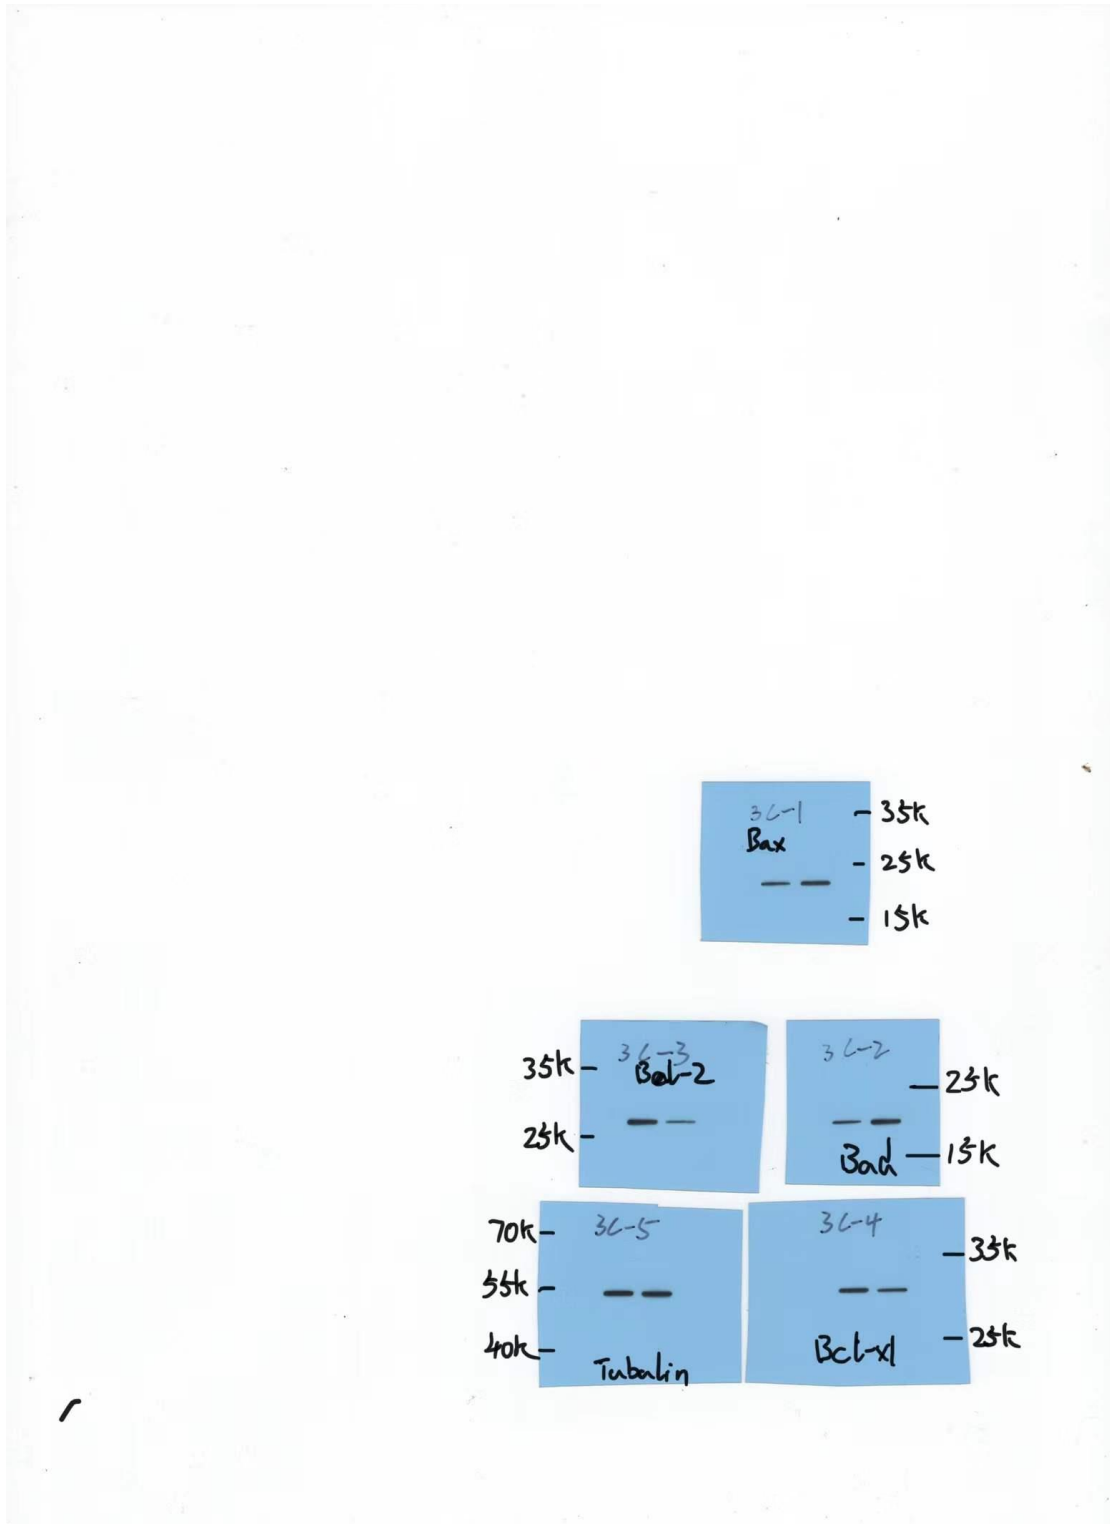

3D

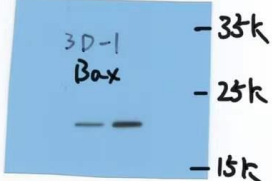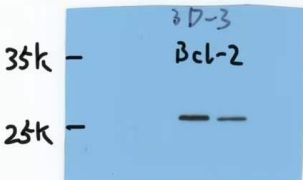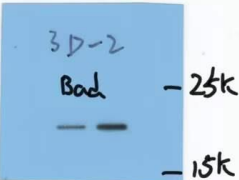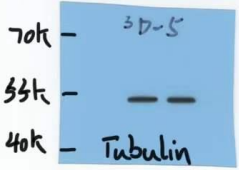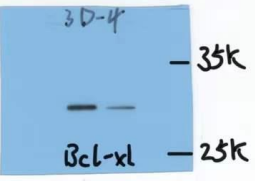

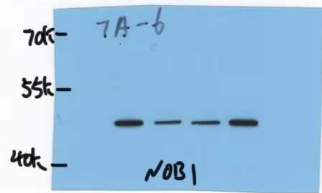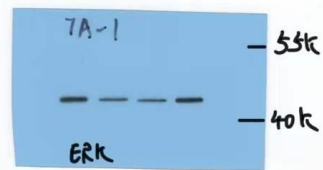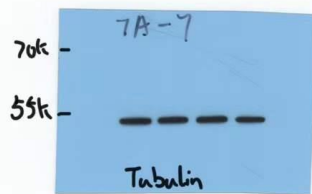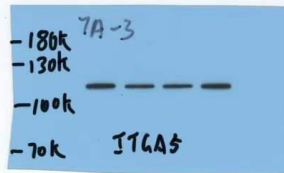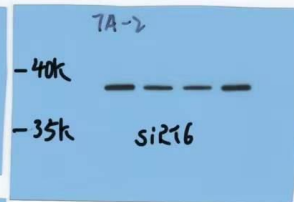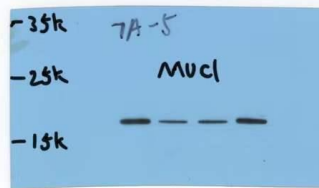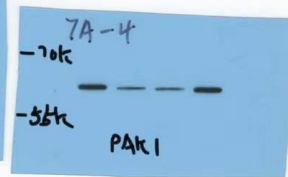

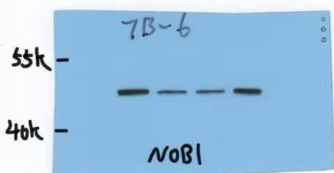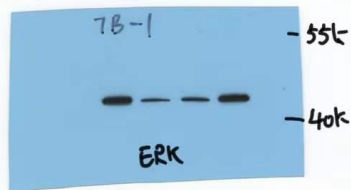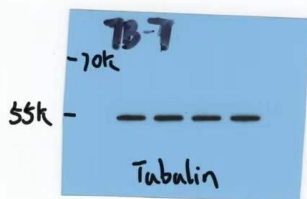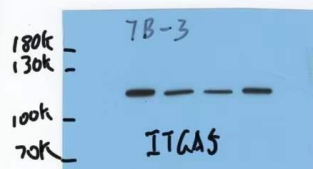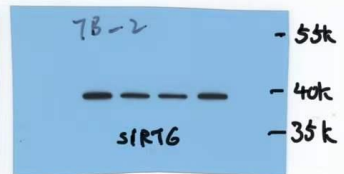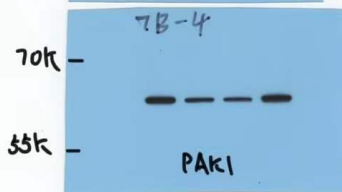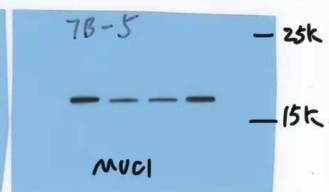

Supplement: 12885_2022_9467_MOESM1_ESM.pdf [file 12885_2022_9467_MOESM1_ESM.pdf]
